# Supplementary material for: Ileal Transposition Increases Pancreatic β Cell Mass and Decreases β Cell Senescence in Diet-Induced Obese Rats
Source: Springer Nature journal article supplement (doi:10.1007/s11695-020-04406-6), 2020-01-09
Supplement: MOESM1 [file 17689048]

**Supplementary Table 1. Primer sequences for qRT-PCR.**

|  | Forward primer | Reverse primer |
| --- | --- | --- |
| GAPDH | ATG ACT CTA CCC ACG GCA AG | TAC TCA GCA CCA GCA TCA CC |
| TNFα | ACC ACG CTC TTC TGT CTA CTG | CTT GGT GGT TTG CTA CGA C |
| MCP1 | GTG CTG ACC CCA ATA AGG AA | TGA GGT GGT TGT GGA AAA GA |
